# Supplementary material for: Stress keratin 17 enhances papillomavirus infection-induced disease by downregulating T cell recruitment
Source: PubMed Central journal article supplement (PMC6975545; doi:10.1371/journal.ppat.1008206), 2020-01-22

Anti-CXCR3  
K17KO mouse

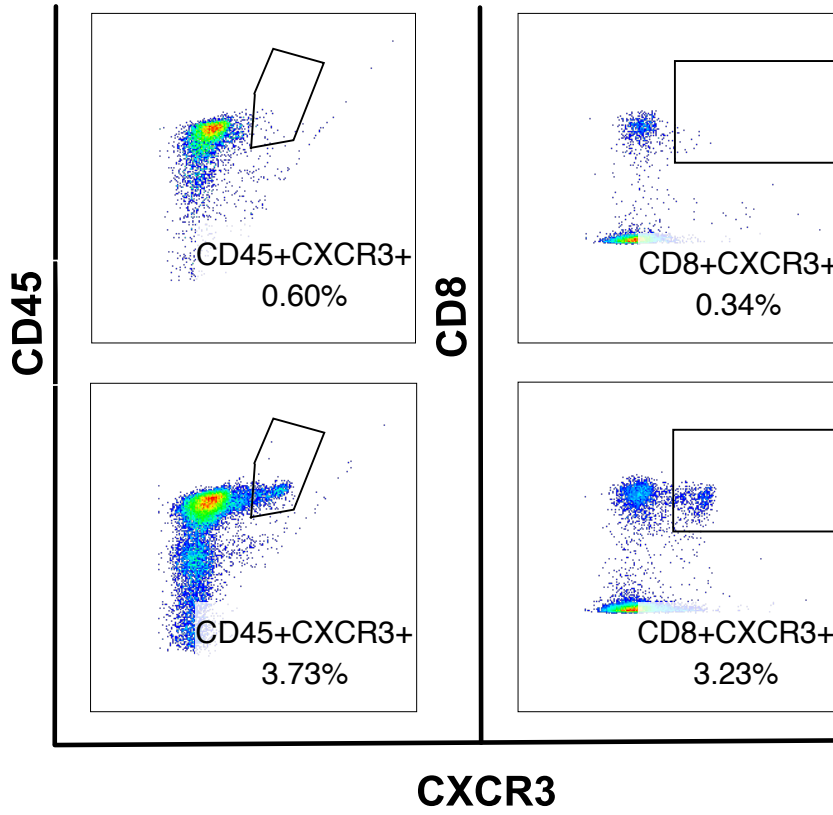

Isotype  
control K17KO  
mouse

**CD45+CXCR3+**

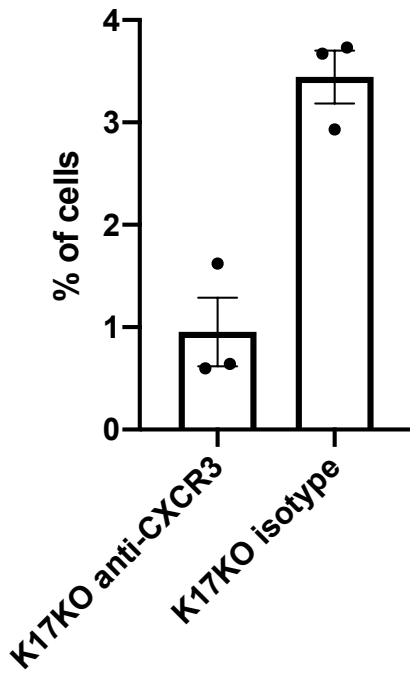

**CD8+CXCR3+**

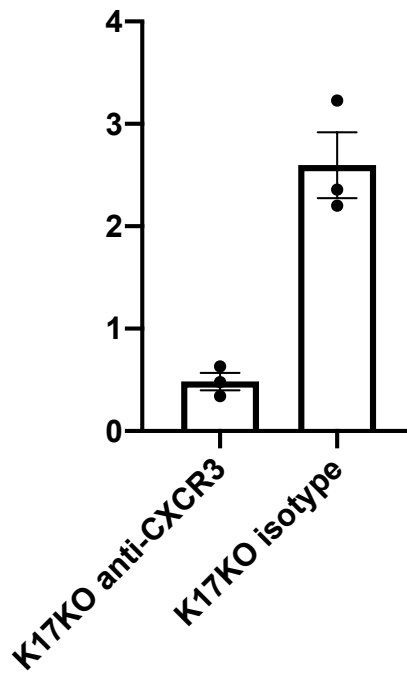

Supplement: ppat.1008206.s010.pdf [file ppat.1008206.s010.pdf]
