# Supplementary material for: Stress keratin 17 enhances papillomavirus infection-induced disease by downregulating T cell recruitment
Source: PubMed Central journal article supplement (PMC6975545; doi:10.1371/journal.ppat.1008206), 2020-01-22

A.

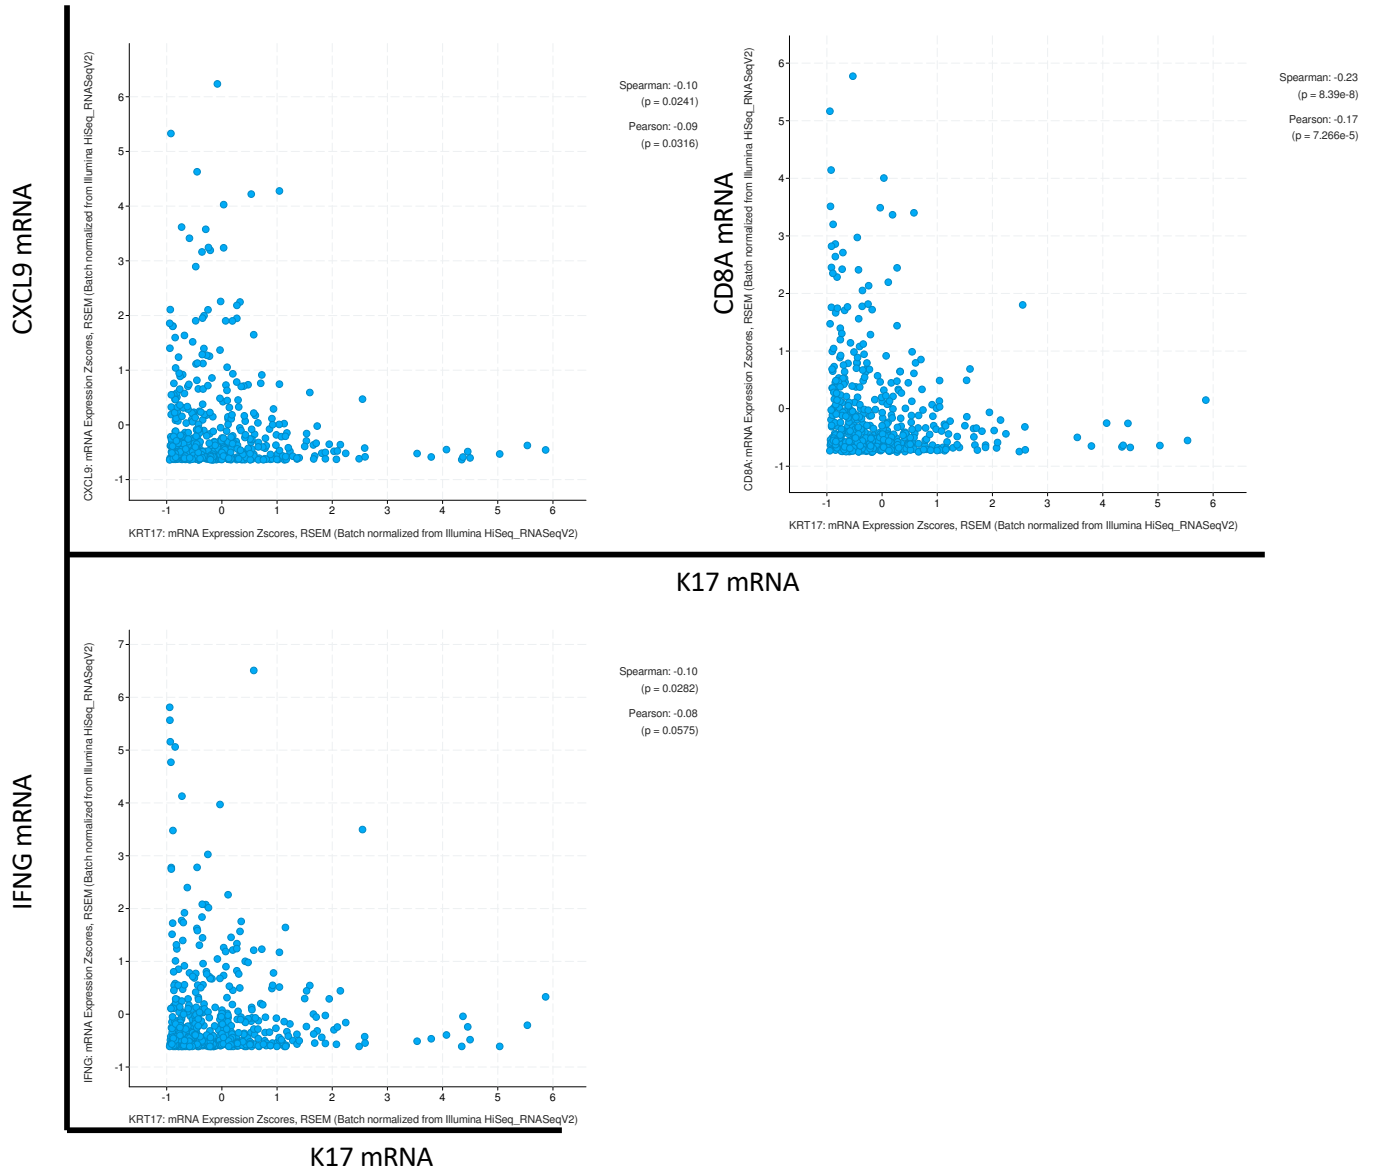

B.

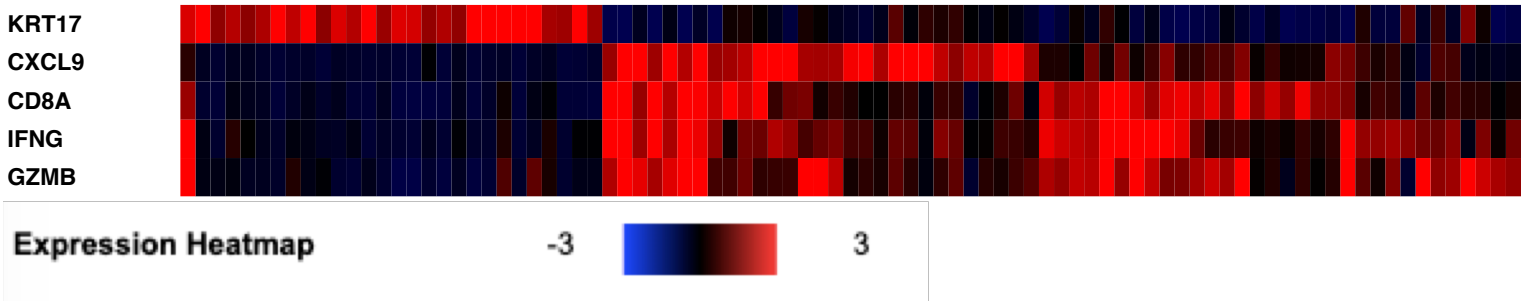

Supplement: ppat.1008206.s011.pdf [file ppat.1008206.s011.pdf]
