# Supplementary material for: Stress keratin 17 enhances papillomavirus infection-induced disease by downregulating T cell recruitment
Source: PubMed Central journal article supplement (PMC6975545; doi:10.1371/journal.ppat.1008206), 2020-01-22

*In vitro* infectivity

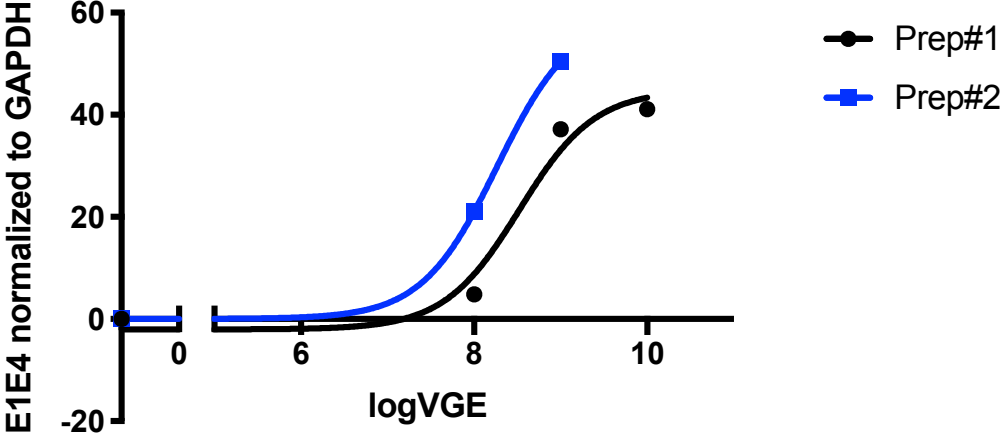

Supplement: ppat.1008206.s013.pdf [file ppat.1008206.s013.pdf]
